# Supplementary material
Source: publisher figshare collection journal article supplement (https://asha.figshare.com/ndownloader/files/36018167)

## Supplemental Material S1. Diagnostic plots.

### Model 5 Adults, CR predicting OASES

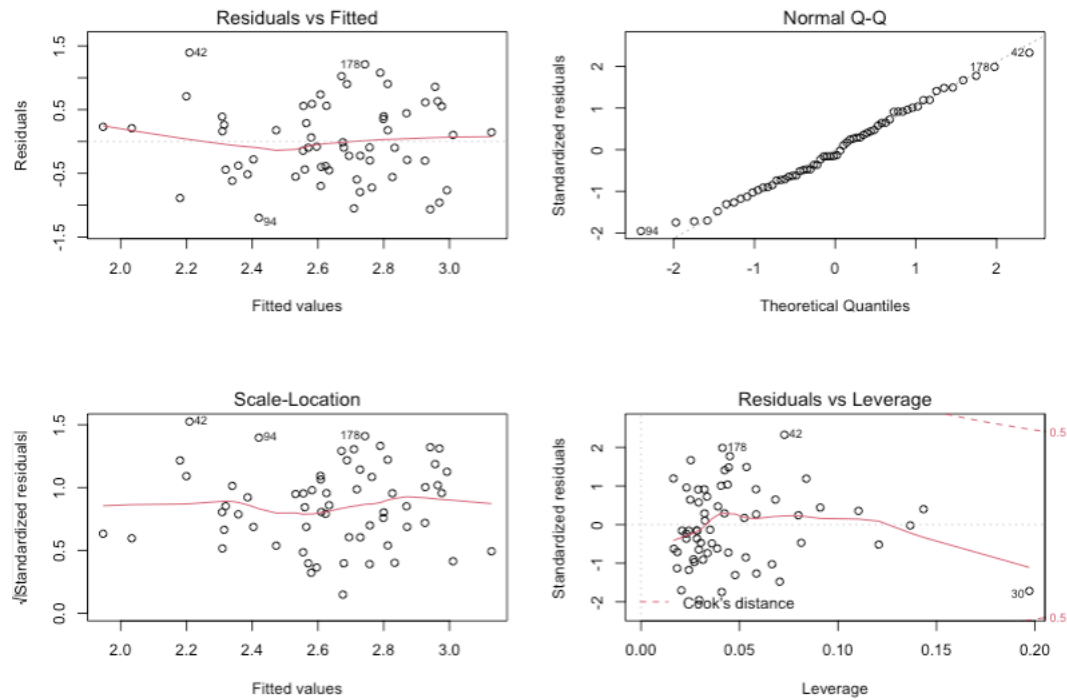

### Model 6 Adults, ES predicting OASES

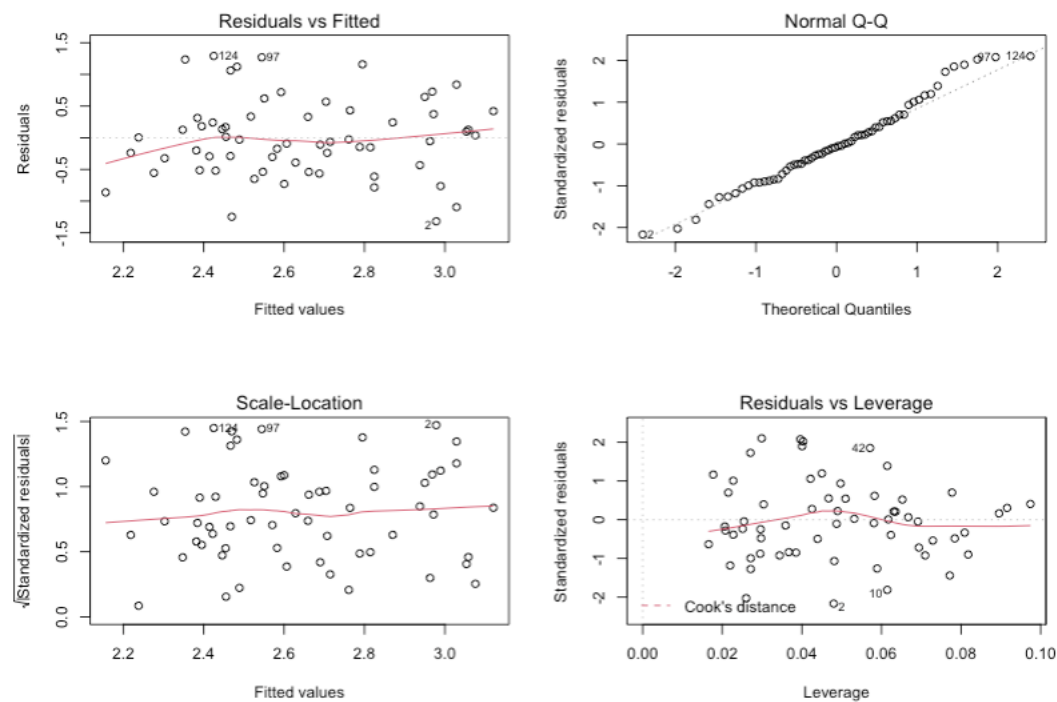

### Model 3 Children, CR predicting OASES

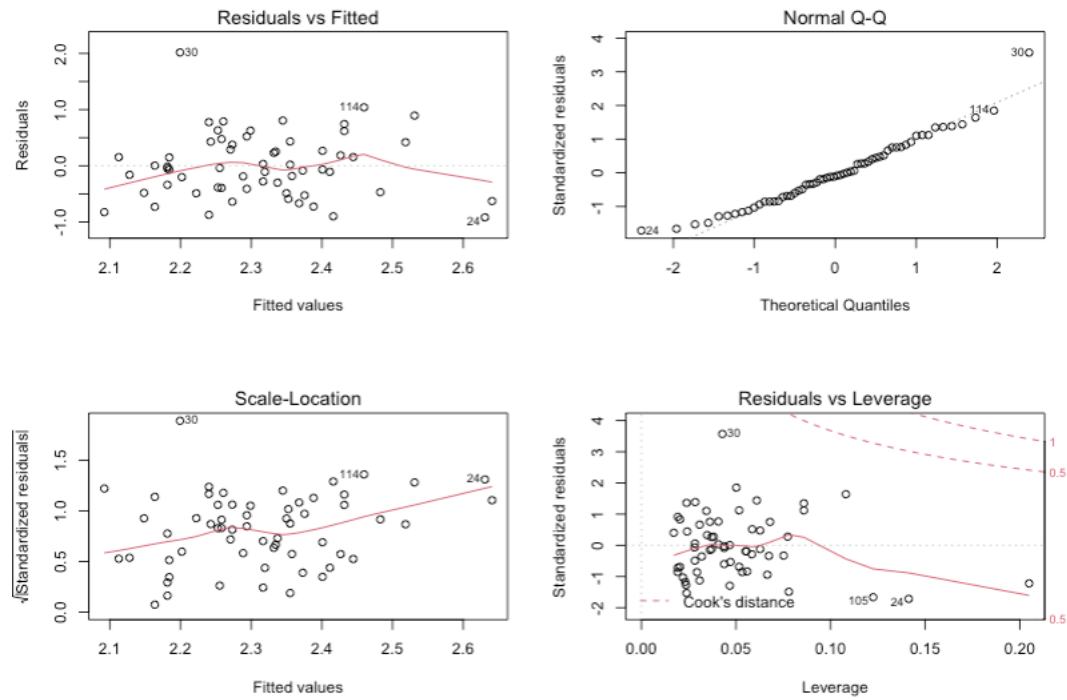

### Model 4 Children, ES predicting OASES

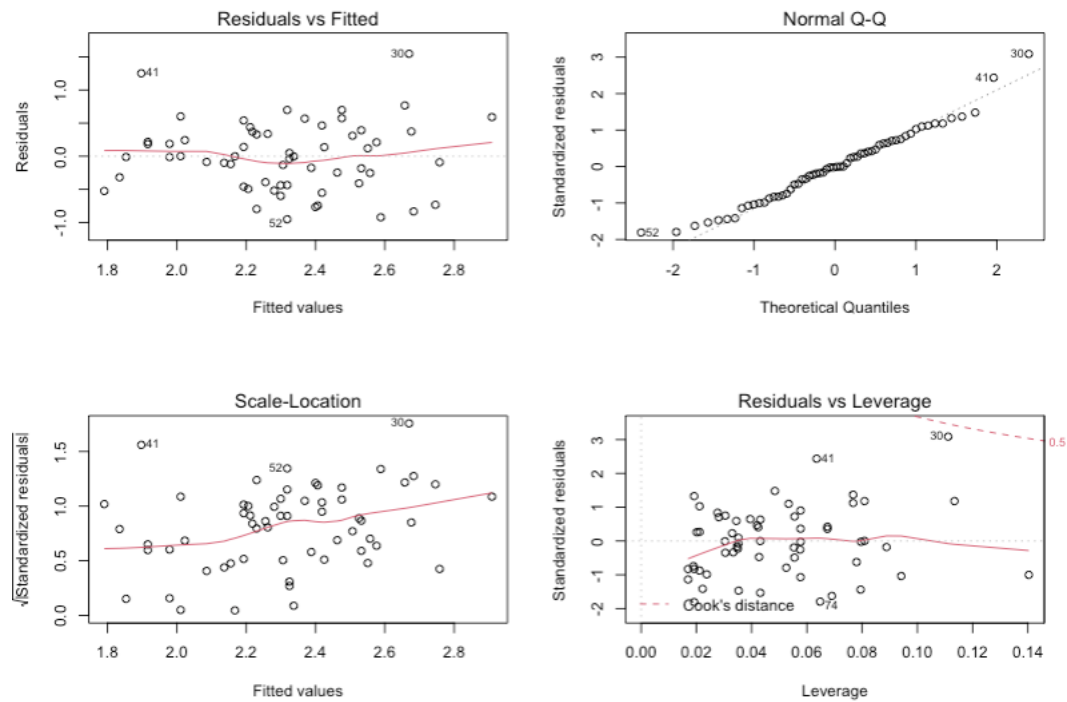

## Model 1, Preschoolers, ERC predicting OASES

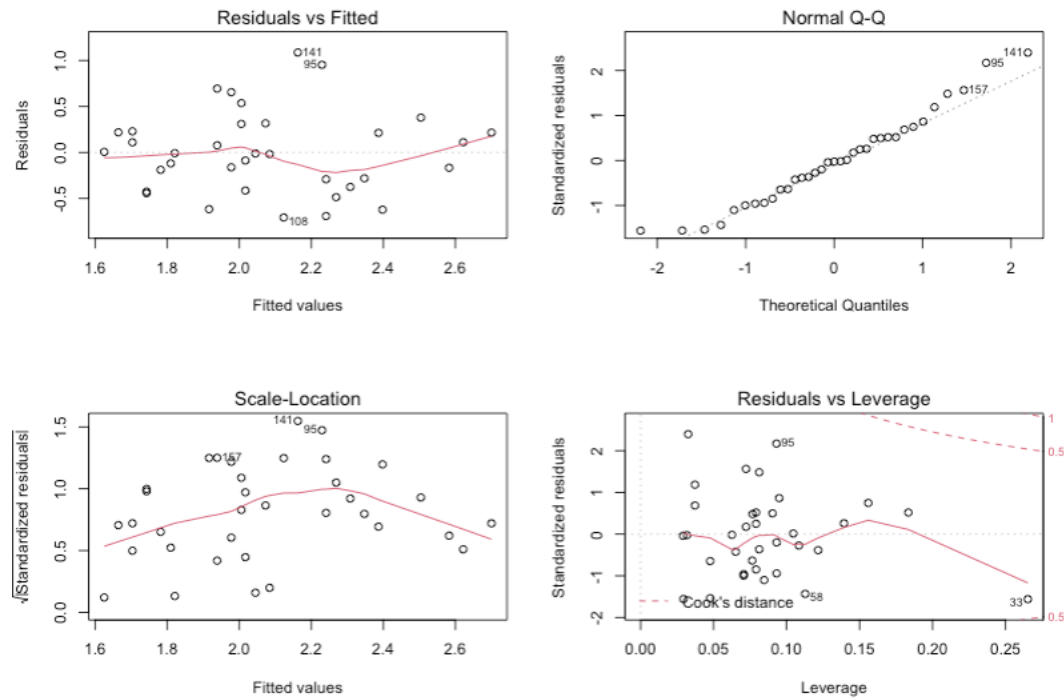

## Model 2, Children, ERC predicting OASES

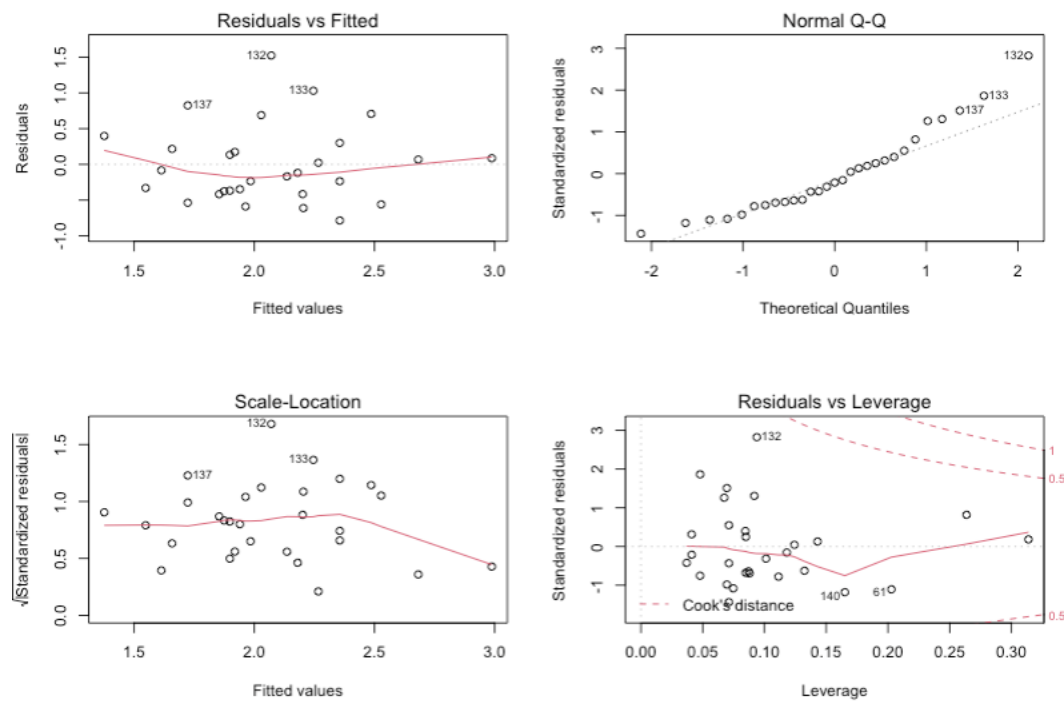

Supplement: Supplementary file 1 [file 36018167]
